# Supplementary material for: The Ntan1 gene is expressed in perineural glia and neurons of adult Drosophila
Source: PubMed Central journal article supplement (PMC9427837; doi:10.1038/s41598-022-18999-8), 2022-08-30
Supplement: 41598_2022_18999_MOESM1_ESM.pdf [file 41598_2022_18999_MOESM1_ESM.pdf]

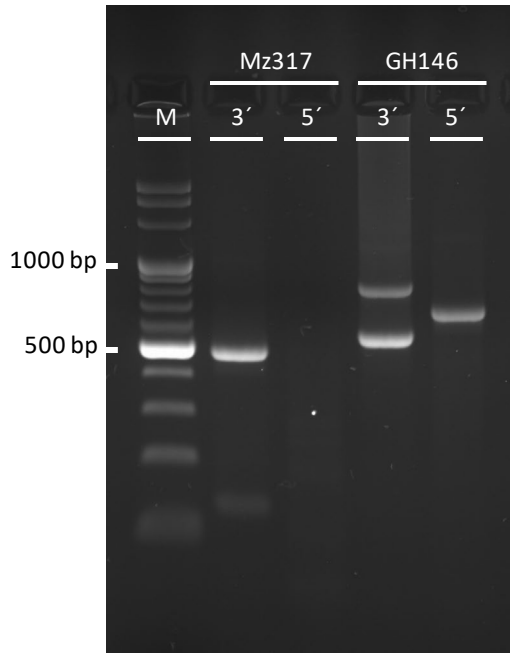

**Figure S1. Representative agarose gel of PCR products of Splinkerette PCR reactions.** Genomic DNA was digested with *PsuI* (*BstYI*) and subjected to splinkerette PCR to amplify the 5' or 3' flanking genomic DNA of the P-element insertion site. M: Molecular marker. Mz317: Genomic DNA amplicon from the *Mz317-Gal4* genotype, GH146: Genomic DNA amplicon from the *GH146-Gal4* genotype. The band obtained for Mz317 was extracted from the agarose gel, purified and DNA sequenced by regular Sanger sequencing.

## Supplementary Figure 2

>3´Mz317-Gal4

```
TACCGGCAACAAGCATGCGCTCCCTTTCTGCCCAACGCACGCTCAACTGAAAACGTTCCAAATGCTTTG
GCGCTGGCGCTTCTCTCTTCTATTCTCGCCGAGTGTCTTTTGGGCCCTCCATTCGCCAGTCGACTTCGAC
TTGGACTTTCGGCTCAGTTGCTTTTCAGTCTCTTTCCGGTTTGGCTCTCGTCTCGCGGAAACTTTGG
CGCACACGCAGTTCCAGACAAATACAATTTAGAATTAATAATATTTAAAAACACAAGTGTACTAAAAG
TTTCTAAAAAACGATTGTTAAGAAATGCCGATGGCTTTGTGAAAATCAGTGAAGATAACAATCCTTAAG
CTAAAGTCTATATACATAGATCCCCTAGTGTGACACCAGTCTCA
```

**Figure S2. Sequencing results of the 3' P-element insertion site of *Mz317-Gal4* line.**

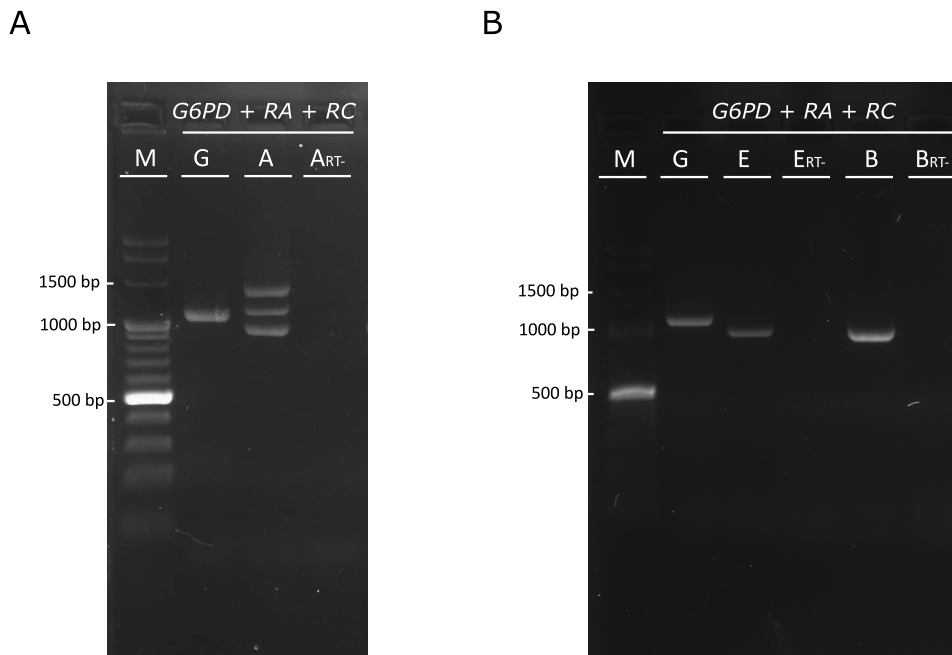

**Figure S3. Gene expression analysis of *G6PD* and *Ntan1* transcripts in *Mz97-Gal4* fly line.** (A) Expression of the *G6PD* housekeeping gene and *Ntan1-RA* and *Ntan1-RC* transcripts by RT-PCR in third antennal segments of *Mz97-Gal4* fly line. (B) Expression of the *G6PD* housekeeping gene and *Ntan1-RA* and *Ntan1-RC* transcripts by RT-PCR in embryos and brains of *Mz97-Gal4* fly line. M: Molecular Marker; G: Genomic DNA; A: Third Antennal Segments cDNA; E: Embryo cDNA; B: Brain cDNA; RT-: RT-PCR without retrotranscriptase.

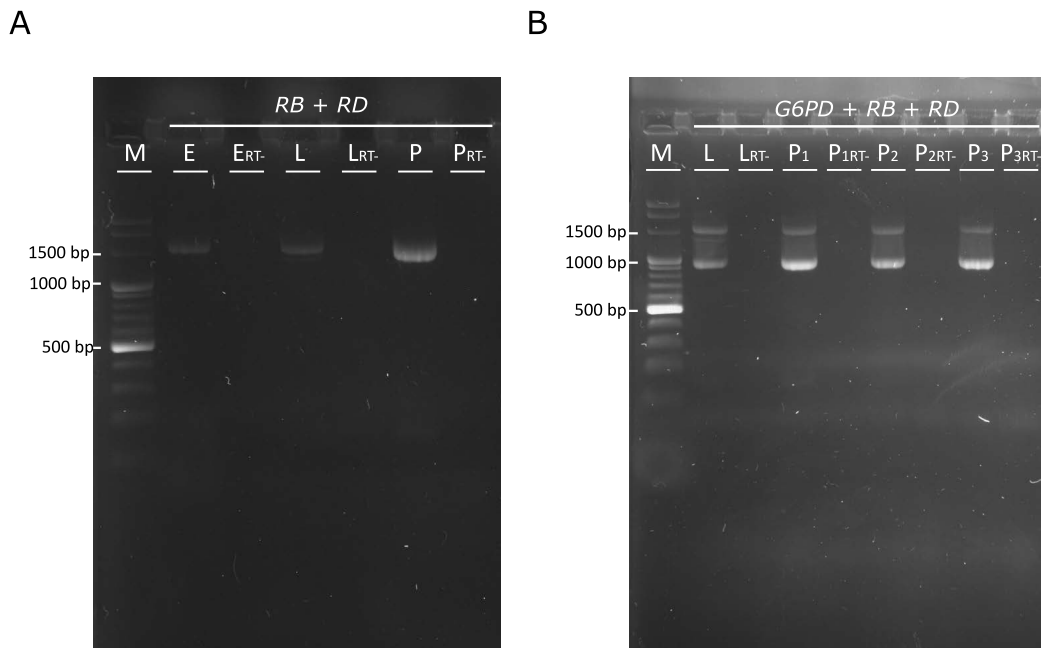

**Figure S4. Gene expression analysis of *Ntan1* transcripts in *wildtype* fly line.** (A) Expression of *Ntan1-RB* and *Ntan1-RD* transcripts by RT-PCR of a mixture of embryos, larvae and pupae at different time points in *wildtype* (*Canton-S*) fly line. (B) Expression of the *G6PD* housekeeping gene and *Ntan1-RB* and *Ntan1-RD* transcripts by RT-PCR in larvae and pupae at different time points in *wildtype* (*Canton-S*) fly line. M: Molecular Marker; E: Embryo cDNA; L: Larva cDNA; P<sub>1</sub>: 24h APF cDNA; P<sub>2</sub>: 48h APF cDNA; P<sub>3</sub>: 72h APF cDNA; P: Pupa cDNA; RT-: RT-PCR without retrotranscriptase.

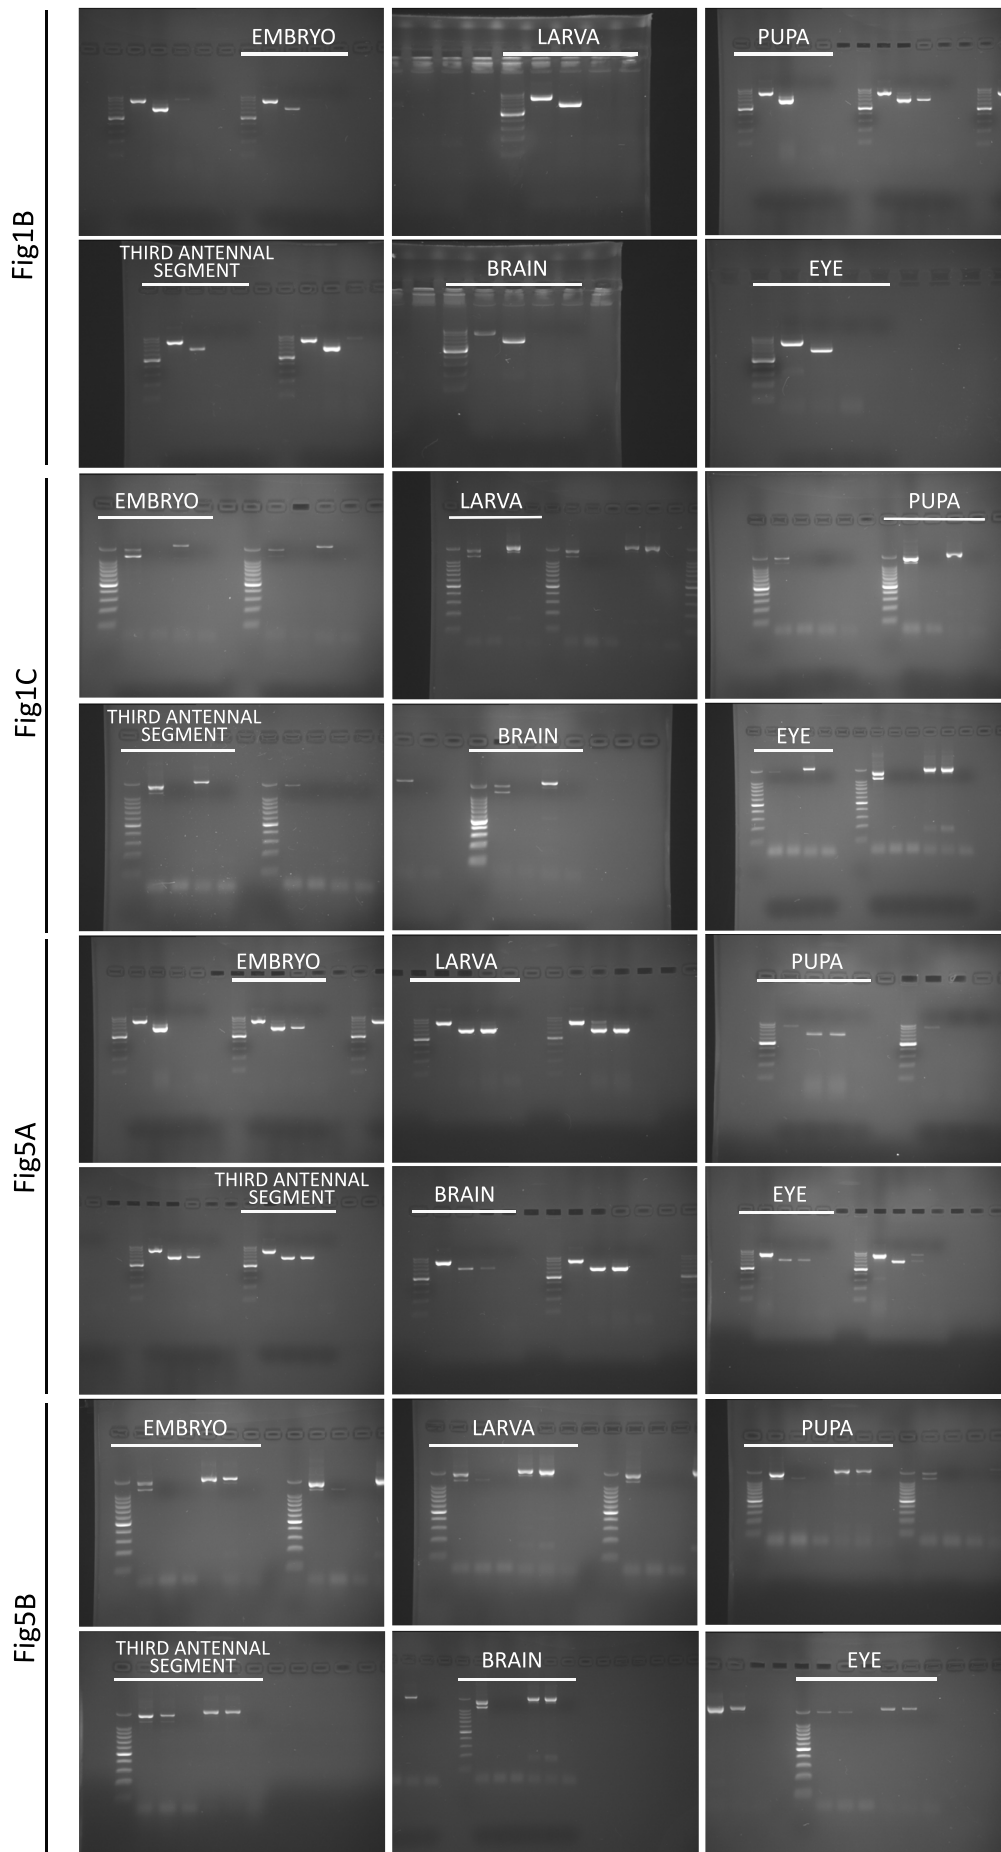

**Figure S5. Original not-cropped images of the gel electrophoresis in Figures 1 and 5.** The selected area of each image is under a white line. The rest of the lanes in the images are irrelevant.

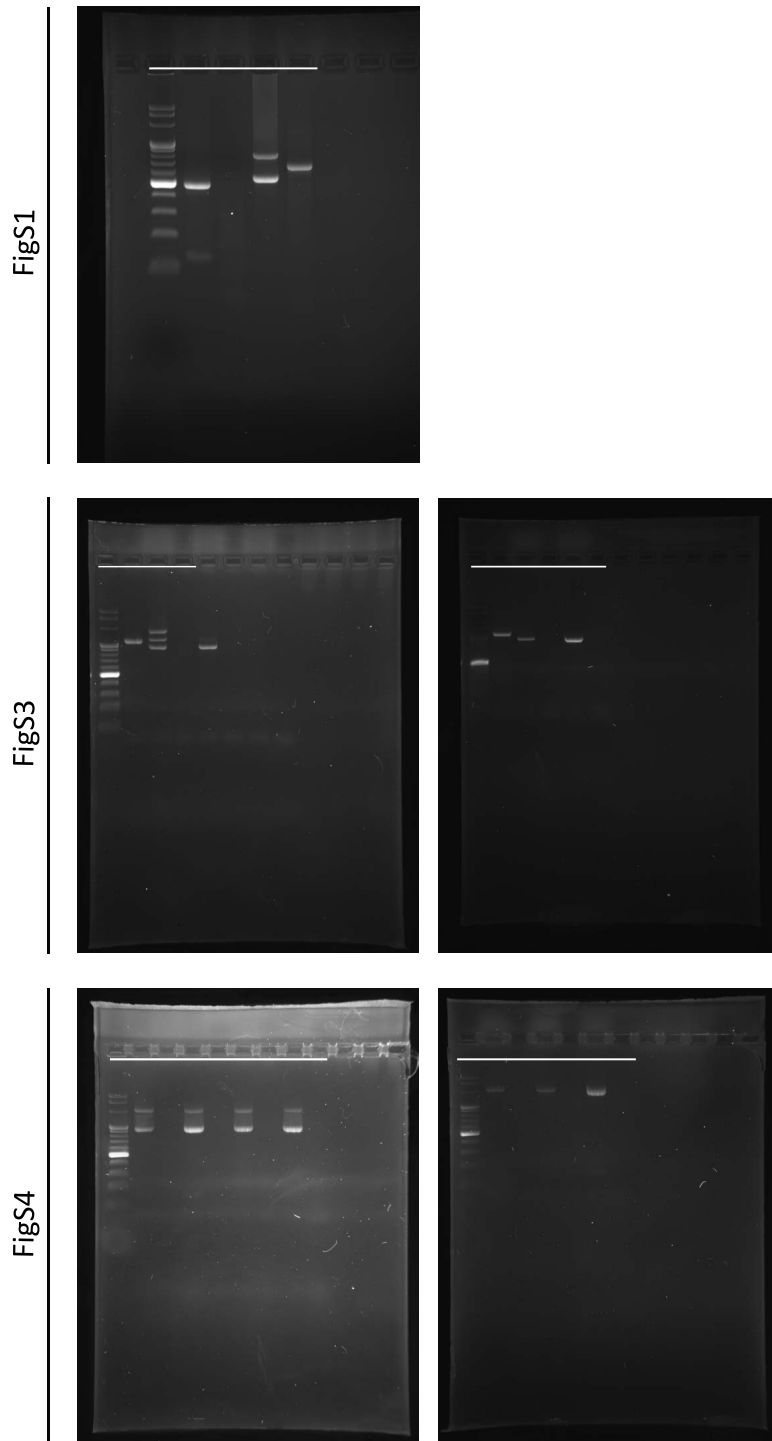

**Figure S6. Original not-cropped images of the gel electrophoresis in Supplementary Figures 1, 3 and 4.** The selected area of each image is under a white line. The rest of the lanes in the images are irrelevant.

## Supplementary Table 1

Table S1. Summary of the number of repetitions for each RT-PCR for the *Ntan1* gene and its transcripts in the different fly lines (*wt*, *Mz317-Gal4* and *Mz97-Gal4*) for each developmental stage and organ studied. \*No expression of one or more transcripts.

|                        | GENE      |                       | TRANSCRIPTS |                       |
|------------------------|-----------|-----------------------|-------------|-----------------------|
|                        | <i>wt</i> | <i>Mz317 and Mz97</i> | <i>wt</i>   | <i>Mz317 and Mz97</i> |
| EMBRYO                 | 1         | 1                     | 2*          | 3*                    |
| LARVA                  | 3         | 1                     | 4           | 4*                    |
| PUPA                   | 2         | 2                     | 4*          | 4*                    |
| BRAIN                  | 4         | 1                     | 6           | 2*                    |
| EYE                    | 2         | 1                     | 3*          | 1*                    |
| THIRD ANTENNAL SEGMENT | 3         | 1                     | 4*          | 3*                    |
